# Supplementary material for: Association of age with health-related quality of life in a cohort of patients with systemic lupus erythematosus: the Georgians Organized Against Lupus study
Source: PubMed Central journal article supplement — Lupus Sci Med. 2016 Jul 19;3(1):e000161. doi: 10.1136/lupus-2016-000161 (PMC4964216; doi:10.1136/lupus-2016-000161), 2016-07-19
Supplement: lupus-2016-000161supp_tables.pdf [file lupus-2016-000161supp_tables.pdf]

**Supplementary Table 1. Sensitivity analyses:** overall adjusted associations of categorical age at survey with summary health-related quality of life scores among systemic lupus erythematosus patients in the Georgians Organized Against Lupus cohort, September 2013-November 2014, with additional adjustments for other potential mediators, compared to primary models\*

| Domain/model                                 | Difference in score (95% CI),<br>compared to age 20-39 years |                     |
|----------------------------------------------|--------------------------------------------------------------|---------------------|
|                                              | Age 40-59 years                                              | ≥Age 60 years       |
| <b>Physical Component Summary</b>            |                                                              |                     |
| Primary model (including BILD, SLAQ; N=684)  | -1.85 (-3.55,-0.15)                                          | -3.05 (-5.43,-0.66) |
| Primary model + BMI, depression, LIT (N=642) | -1.79 (-3.40,-0.19)                                          | -3.53 (-5.77,-1.28) |
| Primary model + income (N=630)               | -1.82 (-3.56,-0.09)                                          | -2.90 (-5.33,-0.47) |
| Primary model + renal involvement (N=633)    | -2.42 (-4.19,-0.66)                                          | -3.29 (-5.69,-0.89) |
| <b>Physical Functioning</b>                  |                                                              |                     |
| Primary model (including BILD, SLAQ; N=684)  | -1.52 (-3.32,0.27)                                           | -2.94 (-5.46,-0.42) |
| Primary model + BMI, depression, LIT (N=642) | -1.44 (-3.17,0.30)                                           | -3.40 (-5.83,-0.98) |
| Primary model + income (N=630)               | -1.68 (-3.50,-0.35)                                          | -2.92 (-5.50,-0.35) |
| Primary model + renal involvement (N=633)    | -1.66 (-3.54,0.22)                                           | -2.95 (-5.51,-0.39) |
| <b>Role Physical</b>                         |                                                              |                     |
| Primary model (including BILD, SLAQ; N=683)  | -1.45 (-3.15,0.25)                                           | -2.07 (-4.45,0.31)  |
| Primary model + BMI, depression, LIT (N=641) | -1.47 (-2.99,0.06)                                           | -2.87 (-5.00,-0.73) |
| Primary model + income (N=629)               | -1.27 (-3.04,0.50)                                           | -2.16 (-4.65,0.32)  |
| Primary model + renal involvement (N=632)    | -1.85 (-3.64,-0.06)                                          | -2.29 (-4.72,0.13)  |
| <b>Bodily Pain</b>                           |                                                              |                     |
| Primary model (including BILD, SLAQ; N=674)  | -0.15 (-1.88,1.58)                                           | -1.12 (-3.55,1.31)  |
| Primary model + BMI, depression, LIT (N=633) | -0.29 (-1.82,1.25)                                           | -2.32 (-4.48,-0.17) |
| Primary model + income (N=621)               | 0.02 (-1.76,1.79)                                            | -1.10 (-3.59,1.39)  |
| Primary model + renal involvement (N=623)    | -0.64 (-2.44,1.16)                                           | -0.99 (-3.44,1.46)  |
| <b>General Health</b>                        |                                                              |                     |
| Primary model (including BILD, SLAQ; N=679)  | -1.52 (-3.24,0.20)                                           | -1.11 (-3.52,1.31)  |
| Primary model + BMI, depression, LIT (N=638) | -1.44 (-3.05,0.17)                                           | -1.71 (-3.97,0.55)  |
| Primary model + income (N=626)               | -1.41 (-3.19,0.37)                                           | -1.38 (-3.88,1.11)  |
| Primary model + renal involvement (N=630)    | -1.58 (-3.41,0.24)                                           | -1.10 (-3.57,1.38)  |
| <b>Mental Component Summary</b>              |                                                              |                     |
| Primary model (including BILD, SLAQ; N=684)  | 0.76 (-1.04,2.56)                                            | 1.62 (-0.90,4.15)   |
| Primary model + BMI, depression, LIT (N=642) | 0.49 (-1.06,2.03)                                            | -0.13 (-2.29,2.02)  |
| Primary model + income (N=630)               | 0.94 (-0.92,2.80)                                            | 1.15 (-1.46,3.76)   |
| Primary model + renal involvement (N=633)    | 1.30 (-0.62,3.22)                                            | 2.14 (-0.46,4.75)   |
| <b>Mental Health</b>                         |                                                              |                     |
| Primary model (including BILD, SLAQ; N=684)  | 0.79 (-0.93,2.51)                                            | 1.77 (-0.64,4.18)   |
| Primary model + BMI, depression, LIT (N=642) | 0.44 (-1.10,1.97)                                            | 0.39 (-1.76,2.54)   |
| Primary model + income (N=630)               | 1.00 (-0.79,2.80)                                            | 1.50 (-1.01,4.02)   |
| Primary model + renal involvement (N=633)    | 1.29 (-0.53,3.12)                                            | 2.40 (-0.07,4.88)   |
| <b>Role Emotional</b>                        |                                                              |                     |
| Primary model (including BILD, SLAQ; N=681)  | -0.38 (-2.50,1.74)                                           | -0.33 (-3.30,2.64)  |
| Primary model + BMI, depression, LIT (N=639) | -0.31 (-2.22,1.60)                                           | -1.74 (-4.41,0.92)  |
| Primary model + income (N=628)               | -0.50 (-2.72,1.73)                                           | -1.16 (-4.27,1.95)  |
| Primary model + renal involvement (N=630)    | -0.02 (-2.24,2.21)                                           | 0.10 (-2.92,3.12)   |
| <b>Social Functioning</b>                    |                                                              |                     |
| Primary model (including BILD, SLAQ; N=680)  | -0.16 (-1.89,1.57)                                           | 0.04 (-2.37,2.46)   |
| Primary model + BMI, depression, LIT (N=638) | -0.11 (-1.57,1.35)                                           | -1.40 (-3.44,0.64)  |
| Primary model + income (N=626)               | -0.29 (-2.07,1.49)                                           | -0.24 (-2.72,2.24)  |
| Primary model + renal involvement (N=629)    | -0.15 (-1.97,1.68)                                           | -0.16 (-2.63,2.32)  |
| <b>Vitality</b>                              |                                                              |                     |
| Primary model (including BILD, SLAQ; N=682)  | -0.18 (-1.92,1.55)                                           | -0.84 (-3.27,1.59)  |
| Primary model + BMI, depression, LIT (N=640) | -0.65 (-2.23,0.94)                                           | -2.43 (-4.66,-0.21) |
| Primary model + income (N=628)               | 0.46 (-1.32,2.24)                                            | -0.53 (-3.02,1.96)  |
| Primary model + renal involvement (N=631)    | -0.25 (-2.11,1.62)                                           | -0.65 (-3.18,1.89)  |

Complete case analysis was used (only individuals with complete information on the outcome and all covariates included). All subdomain scores are norm-based SF-12 scores. BILD, Brief Index of Lupus Damage; SLAQ, Systemic Lupus Activity Questionnaire; BMI, body mass index; LIT, Lupus Impact Tracker score. Renal involvement determined by American College of Rheumatology diagnostic criteria.\*Adjusted for sex, race (African-American vs. not African-American), employment, marital status, social support, lupus duration, BILD score, and SLAQ score.

**Supplementary Table 2. Sensitivity analyses:** overall associations of continuous age at survey with summary health-related quality of life scores among systemic lupus erythematosus patients in the Georgians Organized Against Lupus cohort, September 2013-November 2014

| <b>Domain/model</b>                       | <b>Mean difference in score (95% CI),<br/>per +10 years of age</b> |
|-------------------------------------------|--------------------------------------------------------------------|
| <b>Physical Component Summary (N=684)</b> |                                                                    |
| Crude                                     | -1.47 (-2.09,-0.86)                                                |
| Multivariable adjusted*                   | -1.37 (-2.07,-0.67)                                                |
| Multivariable + BILD and SLAQ score       | -1.15 (-1.79,-0.51)                                                |
| <b>Physical Functioning (N=684)</b>       |                                                                    |
| Crude                                     | -1.38 (-2.02,-0.73)                                                |
| Multivariable adjusted*                   | -1.22 (-1.95,-0.50)                                                |
| Multivariable + BILD and SLAQ score       | -1.03 (-1.71,-0.35)                                                |
| <b>Role Physical (N=683)</b>              |                                                                    |
| Crude                                     | -0.84 (-1.47,-0.21)                                                |
| Multivariable adjusted*                   | -0.73 (-1.43,-0.03)                                                |
| Multivariable + BILD and SLAQ score       | -0.53 (-1.17,0.11)                                                 |
| <b>Bodily Pain (N=674)</b>                |                                                                    |
| Crude                                     | -0.88 (-1.54,-0.22)                                                |
| Multivariable adjusted*                   | -0.83 (-1.57,-0.10)                                                |
| Multivariable + BILD and SLAQ score       | -0.62 (-1.27,0.04)                                                 |
| <b>General Health (N=679)</b>             |                                                                    |
| Crude                                     | -0.71 (-1.33,-0.10)                                                |
| Multivariable adjusted*                   | -0.68 (-1.40,0.03)                                                 |
| Multivariable + BILD and SLAQ score       | -0.48 (-1.13,0.17)                                                 |
| <b>Mental Component Summary (N=684)</b>   |                                                                    |
| Crude                                     | 0.58 (-0.08,1.24)                                                  |
| Multivariable adjusted*                   | 0.64 (-0.09,1.37)                                                  |
| Multivariable + BILD and SLAQ score       | 0.75 (0.07,1.42)                                                   |
| <b>Mental Health (N=684)</b>              |                                                                    |
| Crude                                     | 0.48 (-0.15,1.11)                                                  |
| Multivariable adjusted*                   | 0.55 (-0.15,1.25)                                                  |
| Multivariable + BILD and SLAQ score       | 0.65 (0.01,1.30)                                                   |
| <b>Role Emotional (N=681)</b>             |                                                                    |
| Crude                                     | -0.02 (-0.80,0.76)                                                 |
| Multivariable adjusted*                   | 0.03 (-0.82,0.88)                                                  |
| Multivariable + BILD and SLAQ score       | 0.19 (-0.61,0.99)                                                  |
| <b>Social Functioning (N=680)</b>         |                                                                    |
| Crude                                     | -0.30 (-0.94,0.34)                                                 |
| Multivariable adjusted*                   | -0.15 (-0.87,0.57)                                                 |
| Multivariable + BILD and SLAQ score       | 0.03 (-0.62,0.68)                                                  |
| <b>Vitality (N=682)</b>                   |                                                                    |
| Crude                                     | -0.26 (-0.85,0.33)                                                 |
| Multivariable adjusted*                   | -0.28 (-0.97,0.41)                                                 |
| Multivariable + BILD and SLAQ score       | -0.16 (-0.82,0.49)                                                 |

Complete case analysis was used (only individuals with complete information on the outcome and all covariates included). All subdomain scores are norm-based SF-12 scores. BILD, Brief Index of Lupus Damage; SLAQ, Systemic Lupus Activity Questionnaire.

\*Adjusted for sex, race (African-American vs. not African-American), employment, marital status, social support, and lupus duration.
